# Supplementary material for: Benzene tetracarboxylic acid doped polyaniline nanostructures: morphological, spectroscopic and electrical characterization
Source: Royal Society of Chemistry journal article supplement (doi:10.1039/c2jm33093h), 2012-01-01
Supplement: c2jm33093h.pdf [file c2jm33093h.pdf]

## Electronic Supplementary Information (ESI)

### **Benzene Tetracarboxylic Acid Doped Polyaniline Nanostructures: Morphological, Spectroscopic and Electrical Characterization**

**Utpal Rana <sup>a</sup>, Kuntal Chakrabarti <sup>b</sup> and Sudip Malik <sup>a\*</sup>**

<sup>a</sup> *Polymer Science Unit, Indian Association for the Cultivation of Science, 2A & 2B Raja S.C. Mullick Road., Jadavpur, Kolkata – 700032, India.*

<sup>b</sup> *Applied Material Science Division, Saha Institute of Nuclear Physics, 1/AF Bidhannagar, Kolkata 700064, India.*

#### Table of content

|                                                                         |    |
|-------------------------------------------------------------------------|----|
| 1) Preparation of BTCA/PANI composites, table S1.....                   | S2 |
| 2) Solvent dependent UV-Vis. Spectra of BTCA/PANI(0.25) composite. .... | S3 |
| 3) UV-Vis. Spectra ES and EB state of BTCA/PANI(0.25) composite. ....   | S4 |
| 4) References.....                                                      | S4 |

**1) Table S1:** Preparation of polyaniline using different BTCA concentration and stretching frequencies of quinoid and benzenoid rings of PANI chains.

| <b>Aniline [mmol]</b> | <b>BTCA [mmol]</b> | <b>APS (mmol)</b> | <b>[BTCA ] : [An]</b> | <b>[An] : [APS]</b> | $\gamma_{C=C}$ for quinoid* | $\gamma_{C=C}$ for benzenoid* | <b>I<sub>q</sub>/I<sub>b</sub>*</b> |
|-----------------------|--------------------|-------------------|-----------------------|---------------------|-----------------------------|-------------------------------|-------------------------------------|
| 0.102 g<br>(1.1)      | 0.278 g<br>(1.1)   | 0.248 g<br>(1.1)  | 1:1                   | 1:1                 | 1561                        | 1484                          | 1.017                               |
| 0.102g<br>(1.1)       | 0.139 g<br>(0.55)  | 0.248 g<br>(1.1)  | 0.5:1                 | 1:1                 | 1569                        | 1483                          | 1.011                               |
| 0.102g<br>(1.1)       | 0.070 g<br>(0.27)  | 0.248 g<br>(1.1)  | 0.25:1                | 1:1                 | 1577                        | 1482                          | 1.007                               |
| 0.102 g<br>(1.1)      | 0.028 g<br>(0.10)  | 0.248 g<br>(1.1)  | 0.1:1                 | 1:1                 | 1578                        | 1484                          | 1.009                               |
| 0.102 g<br>(1.1)      | 0.003 g<br>(0.010) | 0.248 g<br>(1.1)  | 0.01:1                | 1:1                 | 1598                        | 1467                          | 0.999                               |

I<sub>q</sub> and I<sub>b</sub> are the intensities of  $\gamma_{C=C}$  for quinoid and benzenoid band, respectively.

\* These data are collected from Figure 5.

## 2) Solvent dependent UV-Vis. Study:

It is well known that the shift in the electronic transition peak is connected with the dielectric constant ( $\epsilon$ ) of the solvent. The spectra show a bathochromic shift of  $\lambda_{\max}$  peak with an increase in the dielectric constant of the solvent. Hence  $\pi_B$ - $\pi_Q$  transition highly influence by dielectric constant of solvent (solvent effect) of BTCA/PANI composite.[1,2]

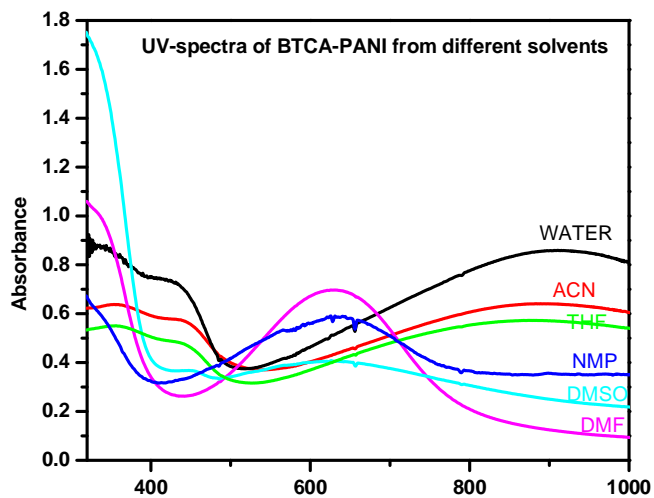

**Figure S1.** UV-Vis absorption spectra of BTCA/PANI(0.25) nanostructures dispersed in different solvents (typical concentration=0.1 mg/ml)

### 3) UV-Vis. Spectra of ES and EB:

Synthesized BTCA/PANI composite was converted into the emeraldine base(EB) by treatment 100 mg of the sample with 1 M NH<sub>4</sub>OH solution 12 h. The base obtained was filtered, washed several times with water and dried in a vacuum for 24 h.

The 1M NH<sub>4</sub>OH treated polyaniline nanostructures introduces an absorption band of approximately 650 nm, simultaneously disappearance of two absorption bands at 437 nm and 910 nm. The long tail to the IR of the 910 nm absorption band also disappears. The two strong absorption bands at approximately 357 nm and 690 nm are attributed to the formation of emeraldine base.[3]

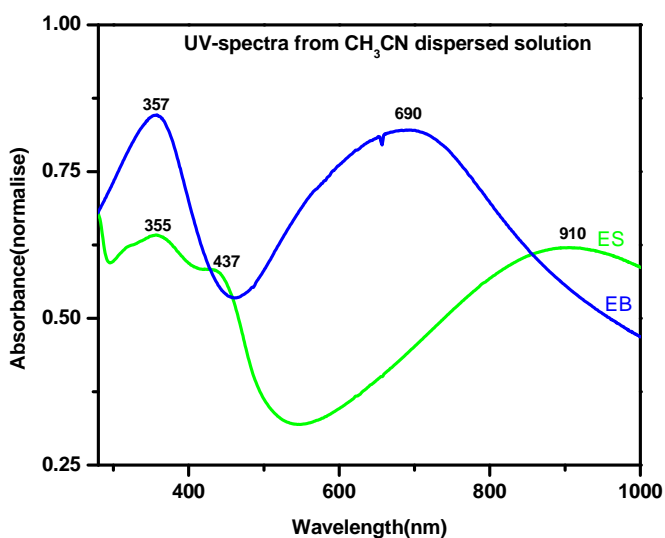

**Figure S2.** UV-Vis spectra of emeraldine salt (ES) and emeraldine base (EB) of BTCA/PANI(0.25) nanostructure dispersed in CH<sub>3</sub>CN (concentration=0.1 mg/ml).

### 4. References:

1. C. Reichardt, *Angew. Chem. Int. Ed.*, 1965, **4**, 29.
2. S. Ghosh and V. Kalpagam, *Synth. Met.*, 1989, **33**, 11.
3. P. S. Rao, D. N. Sathyanarayana and S. Palaniappan, *Macromolecules*, 2002, **35**, 4988.
